# Supplementary material for: Protein Remote Homology Detection Based on an Ensemble Learning Approach
Source: Hindawi journal article supplement (doi:10.1155/2016/5813645), 2016-01-01
Supplement: f1 [file 5813645.f1.pdf]

**Table S1. The three kinds of physicochemical indices for amino acids and corresponding values.**

| <b>Physicochemical properties</b> | <b>Hydrophobicity</b> | <b>Hydrophilicity</b> | <b>Mass</b> |
|-----------------------------------|-----------------------|-----------------------|-------------|
| A                                 | 0.62                  | -0.5                  | 71.079      |
| R                                 | -2.53                 | 3                     | 156.188     |
| N                                 | -0.78                 | 0.2                   | 114.104     |
| D                                 | -0.09                 | 3                     | 115.086     |
| C                                 | 0.29                  | -1                    | 103.145     |
| Q                                 | -0.85                 | 0.2                   | 128.131     |
| E                                 | -0.74                 | 3                     | 129.116     |
| G                                 | 0.48                  | 0                     | 57.052      |
| H                                 | -0.4                  | -0.5                  | 137.141     |
| I                                 | 1.38                  | -1.8                  | 113.160     |
| L                                 | 1.53                  | -1.8                  | 113.160     |
| K                                 | -1.5                  | 3                     | 128.170     |
| M                                 | 0.64                  | -1.3                  | 131.990     |
| F                                 | 1.19                  | -2.5                  | 147.177     |
| P                                 | 0.12                  | 0                     | 97.177      |
| S                                 | -0.18                 | 0.3                   | 87.078      |
| T                                 | -0.05                 | -0.4                  | 101.105     |
| W                                 | 0.81                  | -3.4                  | 186.123     |
| Y                                 | 0.26                  | -2.3                  | 163.176     |
| V                                 | 1.8                   | -1.5                  | 99.133      |
